# Supplementary material for: Binder-free preparation of ZSM-5@silica beads and their use for organic pollutant removal
Source: Royal Society of Chemistry journal article supplement (doi:10.1039/d0qi00259c), 2020-01-01
Supplement: d0qi00259c1.pdf [file d0qi00259c1.pdf]

# Supporting Information

## Binder-free preparation of ZSM-5@silica beads and their use for organic pollutants removal

Ping He,<sup>a</sup> Jiehua Ding,<sup>a</sup> Zhengxing Qin,<sup>b</sup> Lingxue Tang,<sup>a</sup> Kok-Giap Haw,<sup>a</sup> Yiying Zhang,<sup>a</sup>  
Qianrong Fang,<sup>a</sup> Shilun Qiu,<sup>a</sup> Valentin Valtchev<sup>a,c\*</sup>

<sup>a</sup> State Key Laboratory of Inorganic Synthesis and Preparative Chemistry, Jilin University,  
Changchun 130012, China.

<sup>b</sup> State Key Laboratory of Heavy Oil Processing, College of Chemical Engineering, China  
University of Petroleum (East China), Qingdao 266580, China.

<sup>c</sup> Normandie Univ, ENSICAEN, UNICAEN, CNRS, Laboratoire Catalyse et Spectrochimie, 6  
Marechal Juin, 14050 Caen, France.

Number of pages: 10

Number of figures: 9

Number of tables: 1

**Corresponding Author**

E-mail: [valentin.valtchev@ensicaen.fr](mailto:valentin.valtchev@ensicaen.fr)

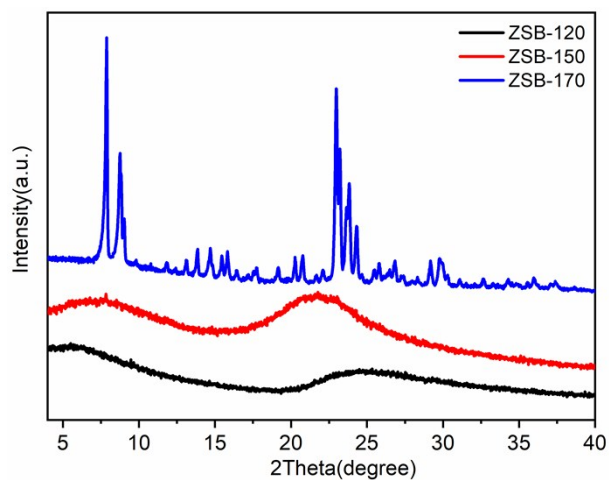

17

18

19 **Figure S1.** The XRD patterns of the zeolite crystals collected from the bulk solution. The

20 synthesis is performed from a template-free system at temperature with 120, 150 and 170 °C.

21

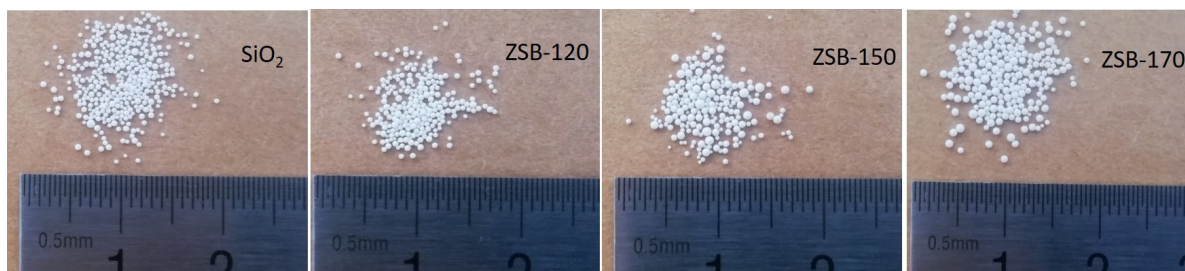

22

23 **Figure S2.** Optical photographs of SiO<sub>2</sub> beads, ZSB-120, ZSB-150, and ZSB-170.

24

25

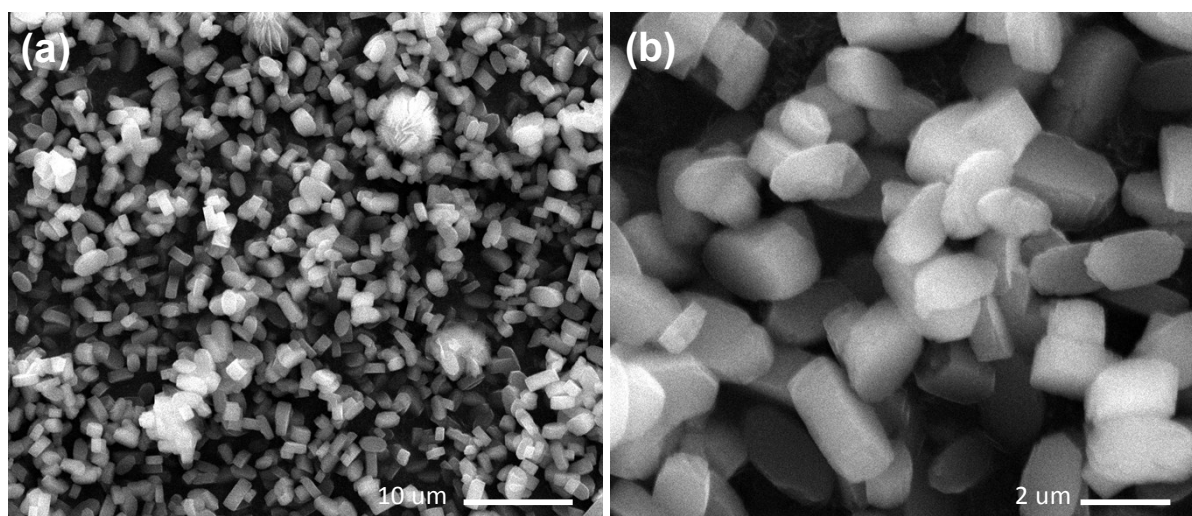

26

27

28 **Figure S3.** Low (a) and high (b) magnification SEM micrographs of zeolite crystals (BS-170)

29

collected from the system yielding ZSB-170.

30

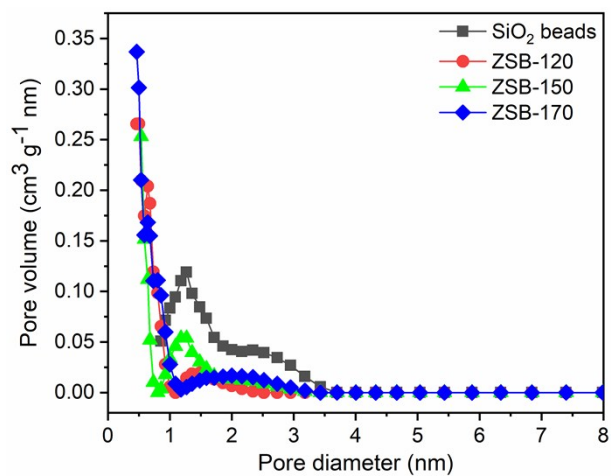

31

32

33

**Figure S4.** DFT pore size distributions of SiO<sub>2</sub>, ZSB-120, ZSB-150 and ZSB-170 beads.

34

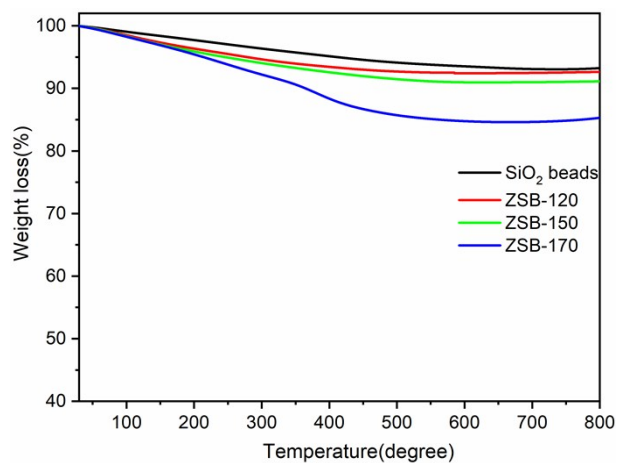

35

36

37

**Figure S5.** Thermal analysis of SiO<sub>2</sub>, ZSB-120, ZSB-150, and ZSB-170 beads.

38

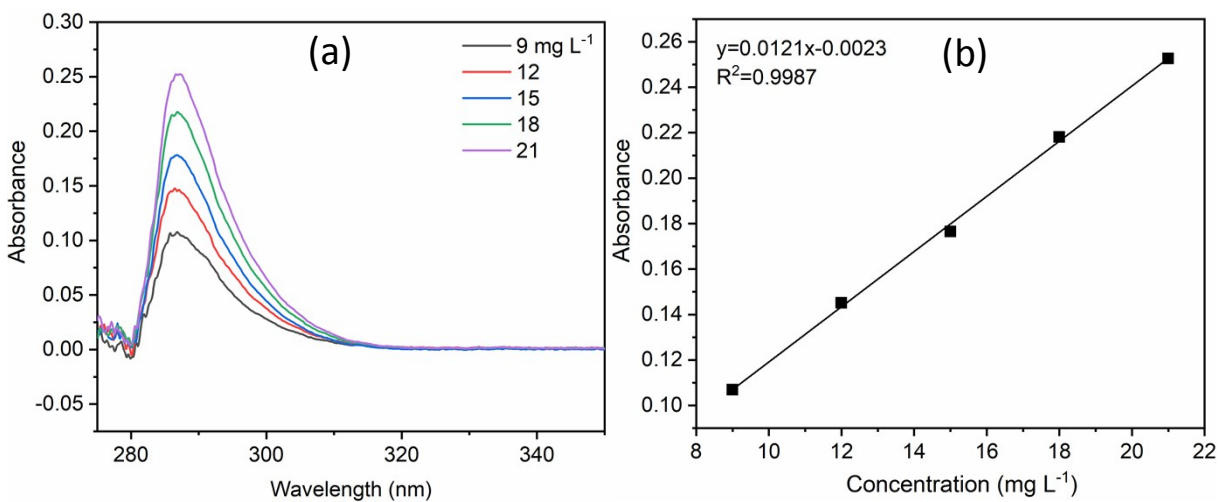

39

40

41

**Figure S6.** UV-vis absorption spectra of aniline solutions at various concentrations (a) and

42

standard curve of the plots of concentration versus absorbance (b).

43

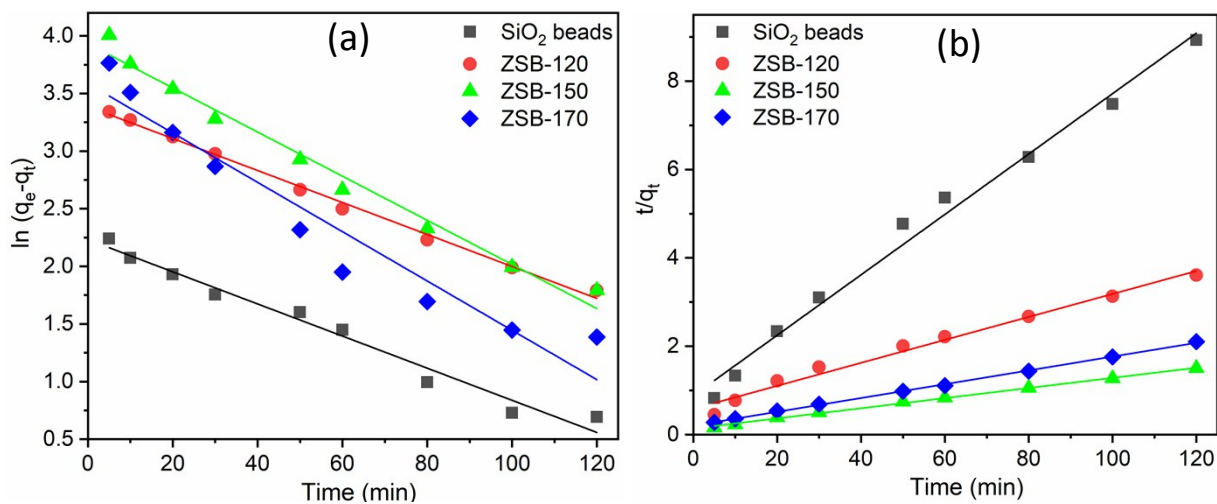

44

45

46

**Figure S7.** Pseudo-first-order (a) and pseudo-second-order (b) kinetics for the adsorption of

47

aniline molecule.

48

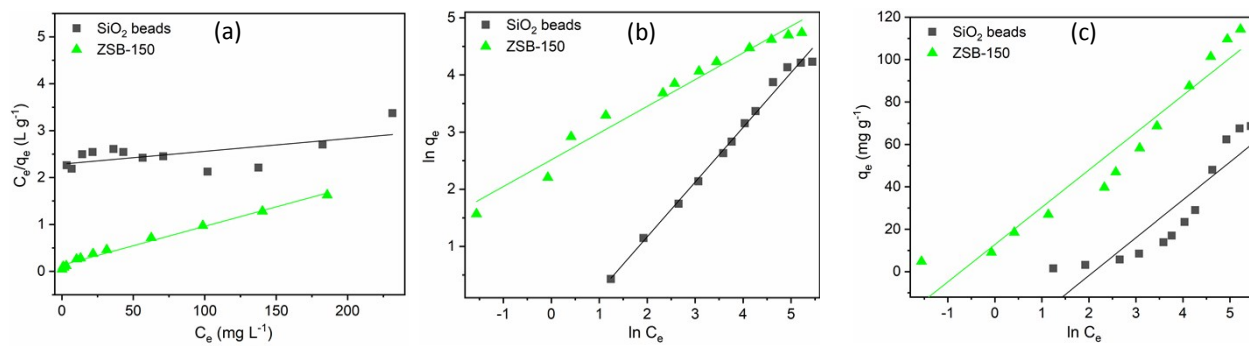

49

50

51 **Figure S8.** Analyses on the aniline adsorption isotherms by Langmuir (a), Freundlich (b) and

52 Temkin (c) models (adsorption time: 12 h, adsorption temperature: 25 °C, adsorbents dose: 1 g L<sup>-1</sup>).

53 1).



54

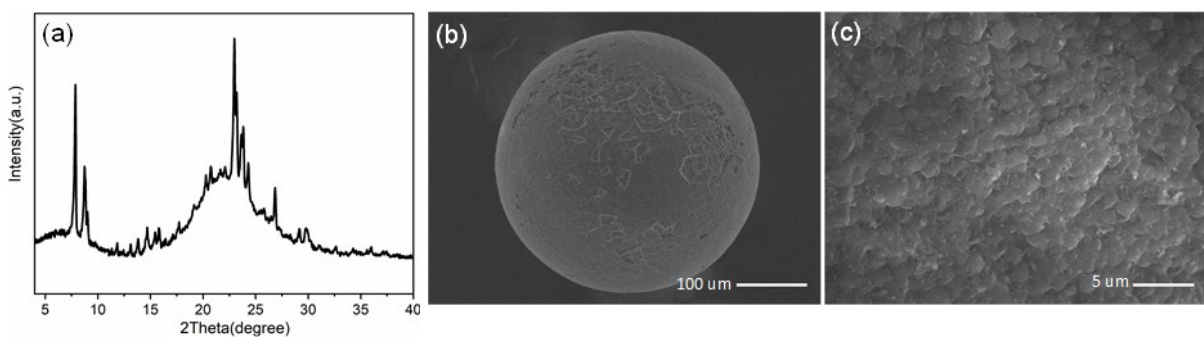

55  
56

57 **Figure S9.** Powder XRD pattern (a), low (b) and high (c) magnification SEM micrographs of

58

used ZSB-150 adsorbents.

59

60

**Table S1.** The elementary composition of the obtained beads.

| Sample                 | Chemical element (mass %) |       |       |      |      |       |
|------------------------|---------------------------|-------|-------|------|------|-------|
|                        | C                         | O     | Si    | Al   | Na   | Si/Al |
| SiO <sub>2</sub> beads | 2.7                       | 49.64 | 46.61 | /    | 1.05 | /     |
| ZSB-120                | 0.63                      | 48.03 | 47.29 | 2.29 | 1.76 | 20.65 |
| ZSB-150                | 2.72                      | 50.94 | 41.01 | 2.92 | 2.41 | 14.04 |
| ZSB-170                | 1.5                       | 49.67 | 43.78 | 2.68 | 2.37 | 16.34 |

61
